# Supplementary material
Source: Springer Nature journal article supplement (https://www.springermedizin.de/resource/supplementary/12946_2003_14_MOESM6_ESM.pdf/9555478)

**A)**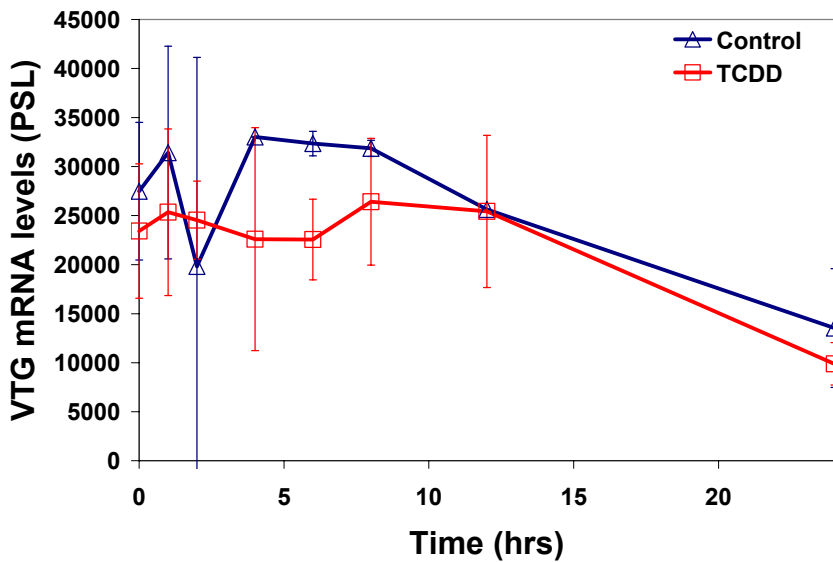**B)**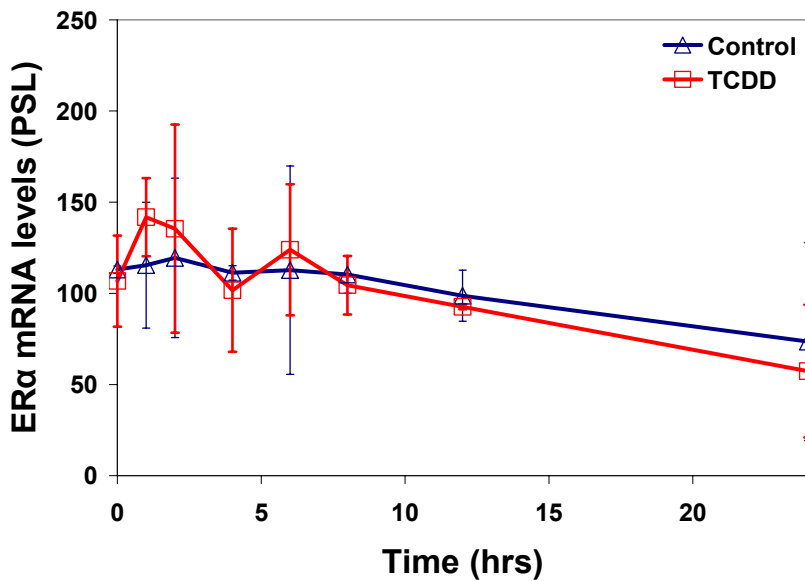

Supplement: MOESM6 [file 9555478]
